# Supplementary material for: The Mouse Cohesin-Associated Protein PDS5B Is Expressed in Testicular Cells and Is Associated with the Meiotic Chromosome Axes
Source: Genes (Basel). 2010 Dec 13;1(3):484–94. doi: 10.3390/genes1030484 (PMC3966231; doi:10.3390/genes1030484)

**Supplementary Figure S1.** Immunoprecipitation (IP) and immunoblotting (IB) of PDS5B using two different anti-PDS5B antibodies, #1 (Cat#IHC-00381, Bethyl Laboratories) and #2 (Cat#A300-538A, Bethyl Laboratories), which recognize distinct epitopes. Nuclear extracts from mouse testis were immunoprecipitated with protein A beads only (Mock) or protein A beads coupled to non-specific immunoglobulin G (IgG), anti-PDS5B #1, or anti-PDS5B #2. Testis nuclear extract proteins and the immunoprecipitates were probed with anti-PDS5B #1 (a) or anti-PDS5B #2 (b). The two antibodies provided similar results.

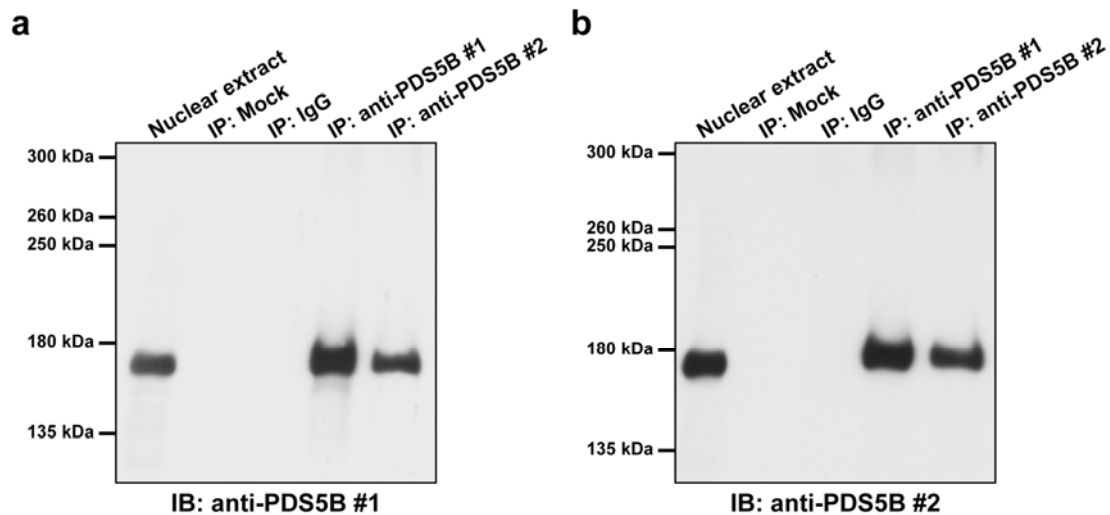

**Supplementary Figure S2.** PDS5B signals, but not SYCP3 signals, are inhibited by the peptide corresponding to the epitope of the anti-PDS5B antibody. Nuclear spreads of pachytene spermatocytes were stained with antibodies against SYCP3 (red) and PDS5B (green) in the presence of the indicated amounts of the peptide. Bar, 10  $\mu$ m.

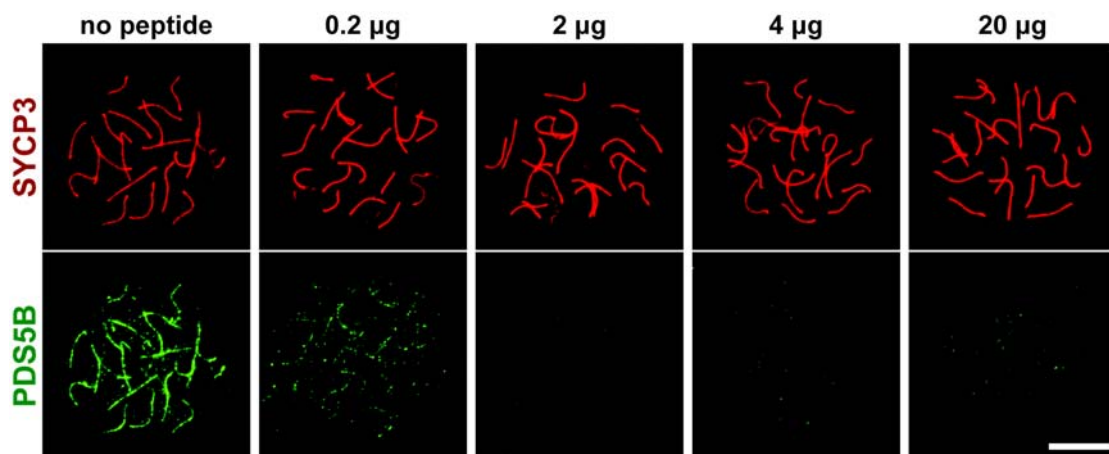

Supplement: Supplementary File 1 — PDF-Document (PDF, 132 KB) [file genes-01-00484-s001.pdf]
